# Supplementary material
Source: MDPI journal article supplement (https://www.mdpi.com/1996-1073/12/12/2265)

## Supplementary Materials

### 1. Load Profiles

**Table 1.** Customer's load profiles in MEA and PEA area (Public data from their website).

| Group | Modeled load profiles (MEA) (Average day in 2015)                                   | Modeled load profiles (PEA) (Average day in 2015)<br>(It shows an average day (an average of each hour of load profile in a day), not a peak day.) |
|-------|-------------------------------------------------------------------------------------|----------------------------------------------------------------------------------------------------------------------------------------------------|
| RES   |                                                                                     |                                                                                                                                                    |
| SGS   | 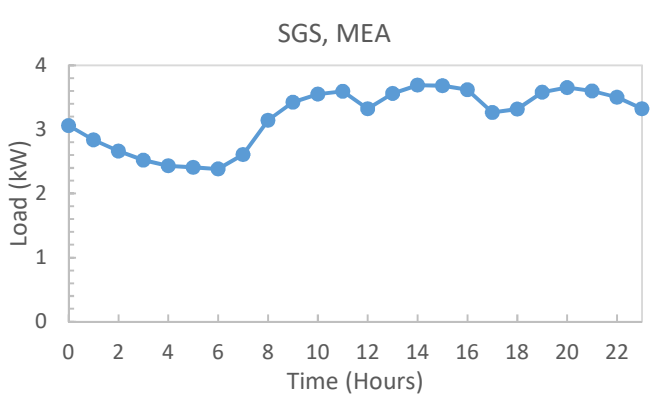  |                                                                 |
| MGS   |  |                                                                |

LGS

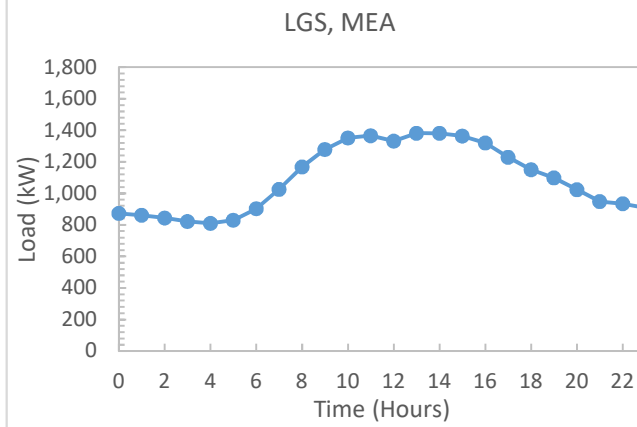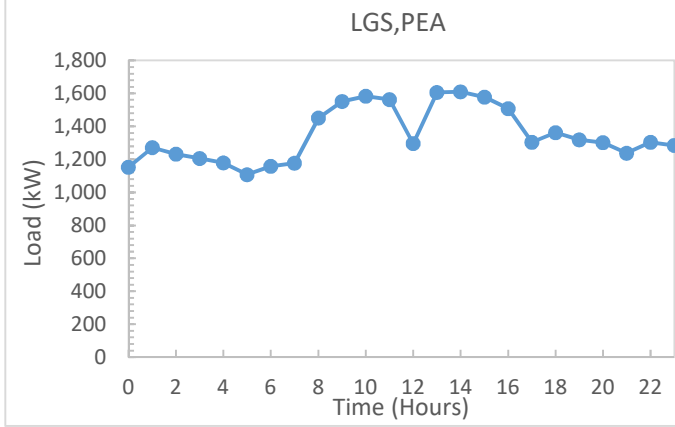

**Table S1.** Utility system's load profiles.

| Utilities | Modeled load profiles (Average day in 2015)                                          |
|-----------|--------------------------------------------------------------------------------------|
| MEA       | 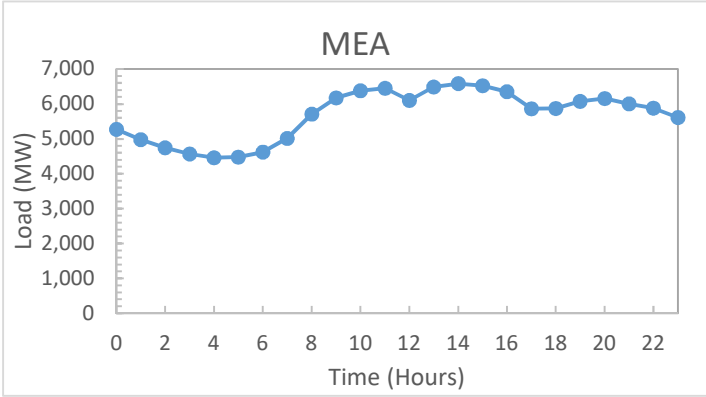   |
| PEA       |   |
| EGAT      |  |

Note: They were calculated based on the individual load profile of each customer group and then extrapolated to cover the overall system of each utility.

## 2. Assumptions

**Table S2.** System parameters for performance model in SAM.

| System Parameters                    | Input                                                   |
|--------------------------------------|---------------------------------------------------------|
| System size (kW)                     | 5,5,100,1000 for Res, SGS, MGS, and LGS                 |
| Module Type                          | Crystalline Silicon                                     |
| Module Efficiency (%)                | 15.9                                                    |
| DC to AC Ratio                       | 1.1                                                     |
| CEC Weighted Inverter Efficiency (%) | 96.65                                                   |
| Array Type                           | Fixed Open Rack                                         |
| Tilt (Latitude) (degrees)            | 13.7                                                    |
| Azimuth (Facing South) (degrees)     | 180                                                     |
| System Losses (%)                    | 14                                                      |
| Ground-to-coverage ratio (GCR)       | 0.3                                                     |
| System Lifetime (years)              | 25                                                      |
| Degradation rate (%)                 | 0.5                                                     |
| Weather data                         | As available in SAM (Same weather data for MEA and PEA) |

**Table S3.** PV installation costs (based on Thailand's PV market as of November 2017).

|                               | RES  | SGS  | MGS  | LGS  |
|-------------------------------|------|------|------|------|
| <b>PV Installation Costs</b>  |      |      |      |      |
| PV installation costs (USD/W) | 1.43 | 1.43 | 1.29 | 1.00 |
| <b>Other Costs</b>            |      |      |      |      |

|                                            |             |             |             |             |
|--------------------------------------------|-------------|-------------|-------------|-------------|
| Operating and maintenance costs (USD/year) | 142.86      | 142.86      | 285.71      | 1,428.57    |
| Insurance costs (% of installation costs)  | 0.25        |             |             |             |
| Interconnection cost (USD)                 | –           | –           | 2,857.14    | 2,857.14    |
| <b>Total</b>                               | <b>1.43</b> | <b>1.43</b> | <b>1.29</b> | <b>1.00</b> |

*Note: Inverter (which constitute about 18% of PV installation costs) was assumed to be replaced every 11 years.*

**Table S4.** Retail rate (public data by MEA and PEA<sup>1</sup>).

(1) Residential scale with block rate (RES)

| <b>Block Rate</b>        | <b>Rate</b> |
|--------------------------|-------------|
| 1–150 unit (USD/kWh)     | 0.092       |
| 151–400 unit (USD/kWh)   | 0.121       |
| Over 400 unit (USD/kWh)  | 0.126       |
| Fixed charge (USD/month) | 1.0920      |

(2) Small general service with block rate (SGS)

| <b>Block Rate (Voltage Level &lt; 12 kV)</b> | <b>Rate</b> |
|----------------------------------------------|-------------|
| 1–150 unit (USD/kWh)                         | 0.092       |
| 151–400 unit (USD/kWh)                       | 0.121       |
| Over 400 unit (USD/kWh)                      | 0.126       |
| Fixed charge (USD/month)                     | 1.0920      |

(3) Medium general service with TOU rate (MGS)

| <b>TOU rate (Voltage level = 12–24 kV)</b> | <b>Rate</b> |
|--------------------------------------------|-------------|
| On peak (USD/kWh)                          | 0.120       |

<sup>1</sup> Fuel adjustment charge (Ft) is not included. It was –0.0045 USD/unit as of September–December 2017. Value Added Tax (VAT) is also not included at 7%

|                          |       |
|--------------------------|-------|
| Off peak (USD/kWh)       | 0.075 |
| Demand charge (USD/kW)   | 3.798 |
| Fixed charge (USD/month) | 8.921 |

(4) Large general service with TOU rate (LGS)

| <b>TOU Rate (Voltage level = 12–24 kV)</b> | <b>Rate</b> |
|--------------------------------------------|-------------|
| On peak (USD/kWh)                          | 0.120       |
| Off peak (USD/kWh)                         | 0.075       |
| Demand charge (USD/kW)                     | 3.798       |
| Fixed charge (USD/month)                   | 8.921       |

**Table S5.** Other parameters for CBA<sup>2</sup>.

| <b>Parameters</b>                   | <b>MEA</b>                                                              | <b>PEA</b>                                                                 | <b>EGAT</b> | <b>References</b>                                                   |
|-------------------------------------|-------------------------------------------------------------------------|----------------------------------------------------------------------------|-------------|---------------------------------------------------------------------|
| Number of customers                 | 3,062,576 for Res<br>517,300 for SGS<br>22,524 for MGS<br>2,324 for LGS | 16,739,341 for Res<br>1,539,077 for SGS<br>72,446 for MGS<br>6,396 for LGS | –           | MEA and PEA as of 2016 and assumed constant throughout the analysis |
| Total electricity consumption (GWh) | 51,183                                                                  | 132,399                                                                    | 183,582     | MEA and PEA and EGAT as of 2017                                     |
| Retail growth rate (% per year)     | 1.89 (or 3.42 including inflation rate) <sup>3</sup>                    |                                                                            |             | PDP 2015                                                            |
| Wholesale growth rate (% per year)  | 1.64 (or 3.16 including inflation rate)                                 |                                                                            |             | PDP 2015                                                            |

<sup>2</sup> Most of data are available online through stakeholder's website unless specified.

<sup>3</sup> Inflation rate was assumed to be 1.5% based on Thailand's market.

|                                         |                                                                                                                                                                                                                      |        |        |                                                     |
|-----------------------------------------|----------------------------------------------------------------------------------------------------------------------------------------------------------------------------------------------------------------------|--------|--------|-----------------------------------------------------|
| Electricity growth rate (% per year)    | 3.54                                                                                                                                                                                                                 |        |        | Average from 2007–2017 based on MEA and PEA's sales |
| Utility's system loss (%)               | 3.5                                                                                                                                                                                                                  | 5.2    | 2.3    | Average from 2010–2014                              |
| Investment cost per year (Million USD)  | 484.57                                                                                                                                                                                                               | 721.83 | 848.14 | MEA, PEA, EGAT and ERC                              |
| Utility's interest rate (%)             | 2.3                                                                                                                                                                                                                  | 2.1    | 6.29   | MEA, PEA, EGAT and ERC                              |
| Projected utility's revenue (MTHB/year) | Depends on electricity growth rate and electricity price growth rate                                                                                                                                                 |        |        |                                                     |
| Integration cost (USD/kW)               | 3.77                                                                                                                                                                                                                 | 3.77   | 23.37  | (Agora,2015) <sup>4</sup>                           |
| Fuel mix and % reserve                  | Depends                                                                                                                                                                                                              |        |        | PDP 2015                                            |
| Fuel price                              | <ul style="list-style-type: none"> <li>- Average purchased electricity (USD/kWh) = 0.07</li> <li>- Coal (USD/ton) = 19.80</li> <li>- Natural gas (USD/MMBtu) = 6.71</li> <li>- Average oil (USD/L) = 0.47</li> </ul> |        |        | ERC with fuel price growth rate as inflation rate   |
| Heat rate                               | <ul style="list-style-type: none"> <li>- Coal = 0.00038 Ton/kWh</li> <li>- Natural gas = 0.007878 MMBtu/kWh</li> <li>- Oil = 0.29441 L/kWh</li> </ul>                                                                |        |        | EIA <sup>5</sup> and advised by EGAT and            |

<sup>4</sup> Agora Energiewende, "The Integration Costs of Wind and Solar Power," Agora Energiewende, Berlin, 2015.

<sup>5</sup> Available online at [https://www.eia.gov/electricity/annual/html/epa\\_08\\_01.html](https://www.eia.gov/electricity/annual/html/epa_08_01.html).

|  |  |                       |
|--|--|-----------------------|
|  |  | constant over<br>time |
|--|--|-----------------------|



### 3. Detailed Results

**Table S7.** Net economic impacts (net costs and benefits).

(a) MEA

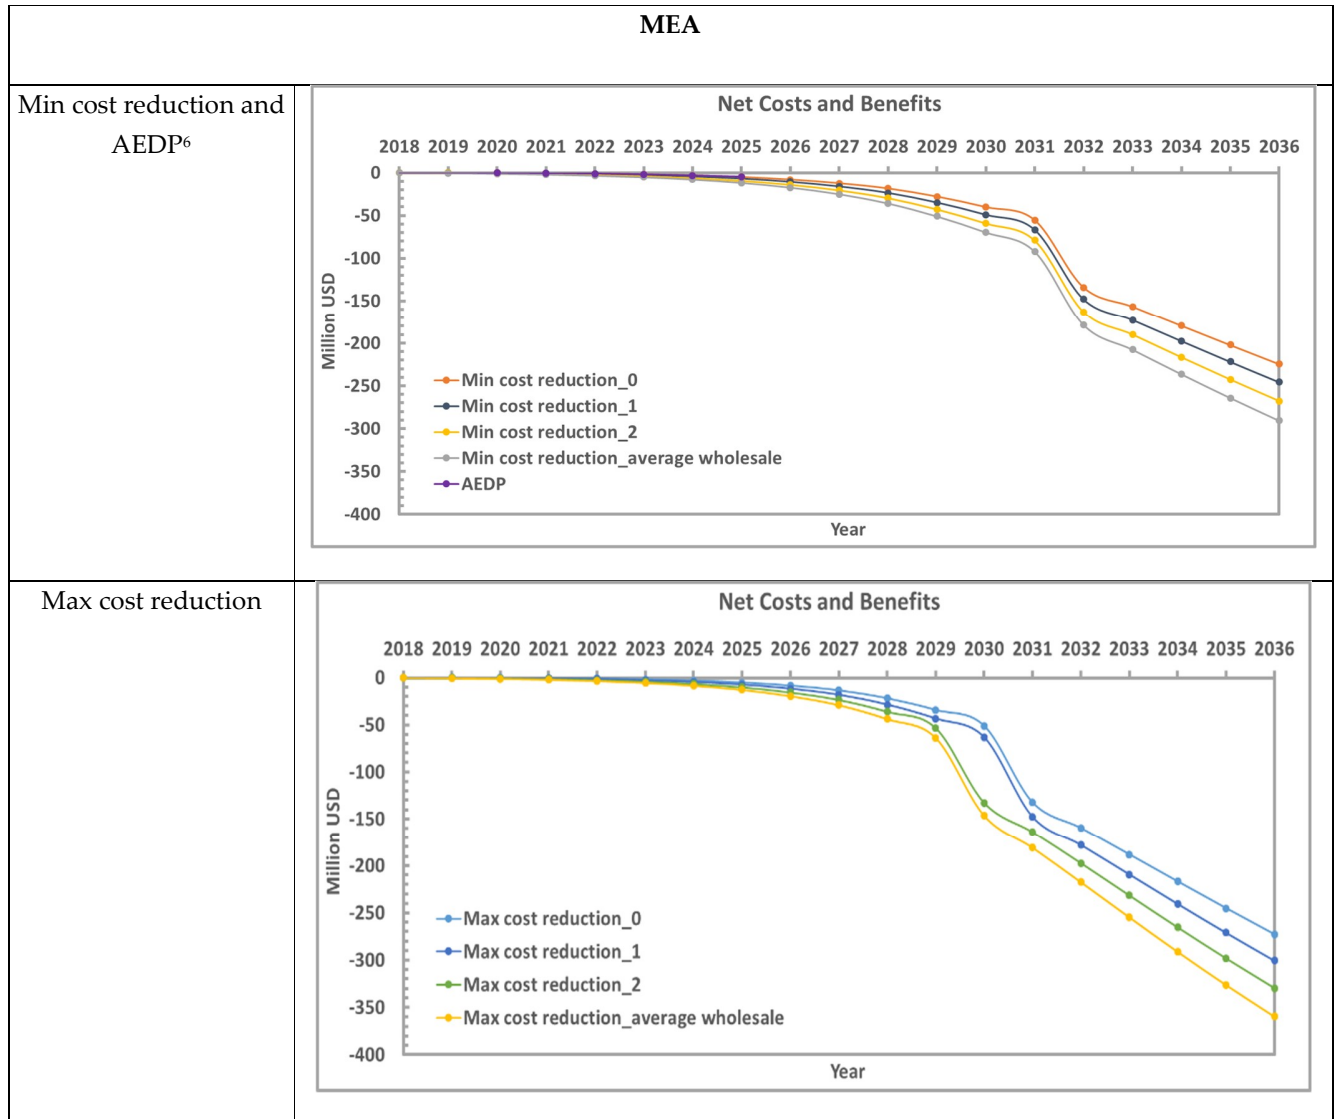

<sup>6</sup> Only from 2018–2025 as discussed earlier in the paper.

(b) PEA

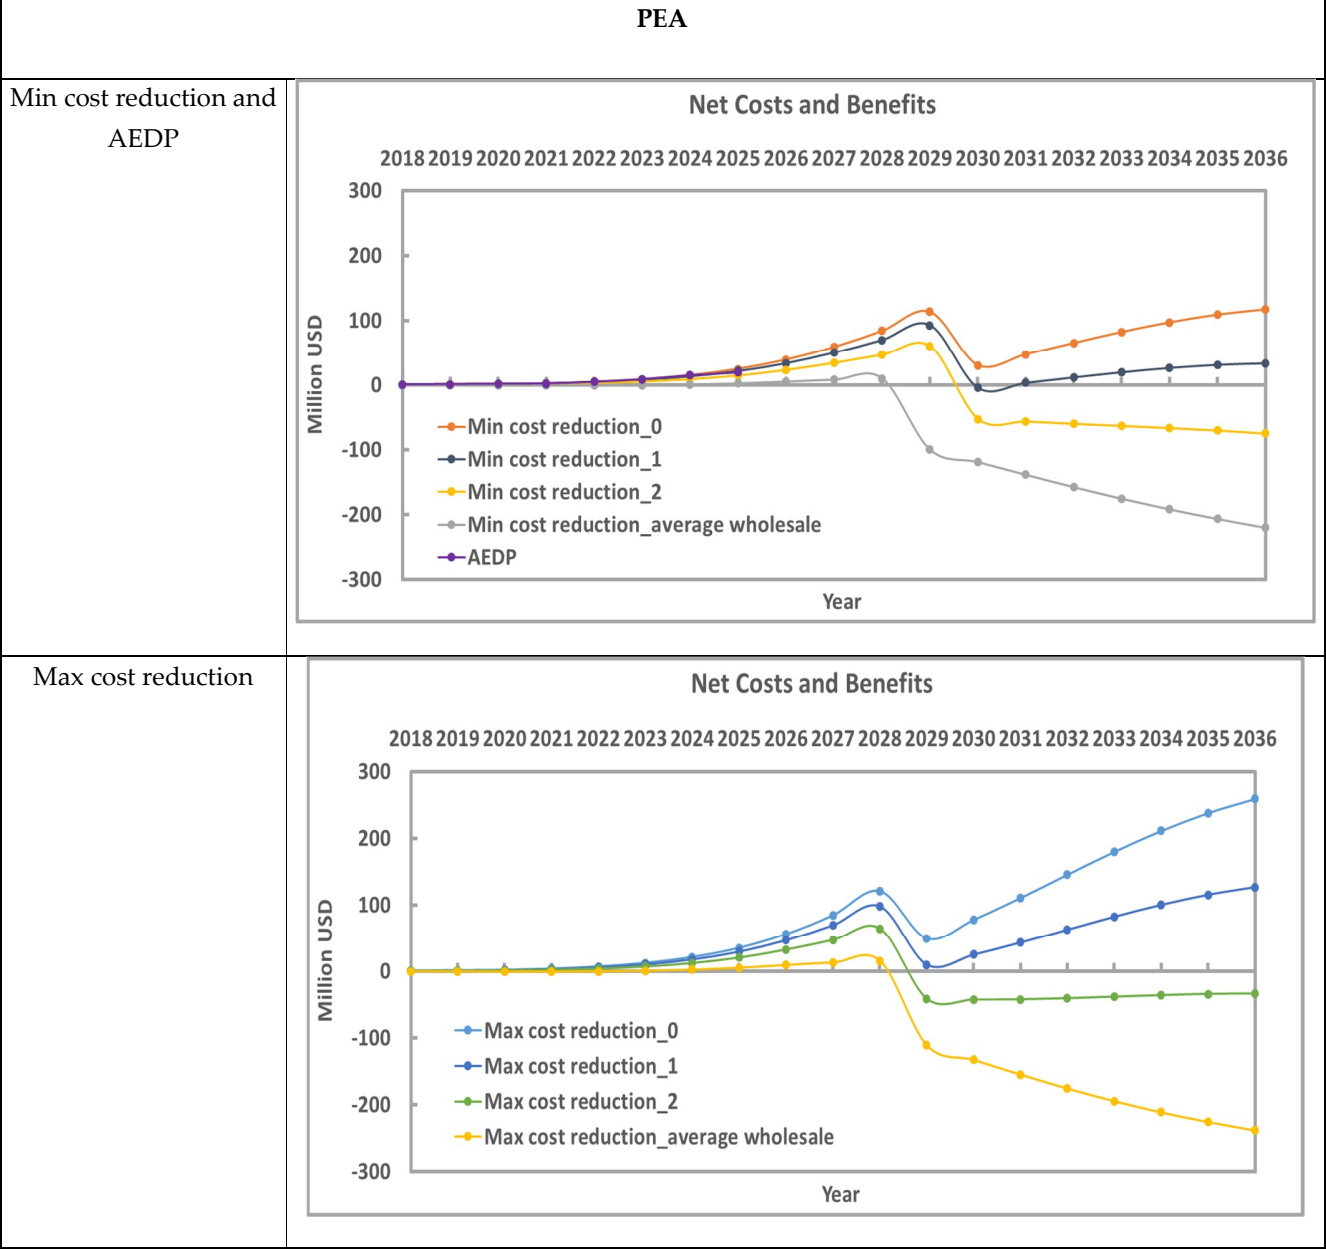

(c) EGAT

Min cost reduction  
and AEDP

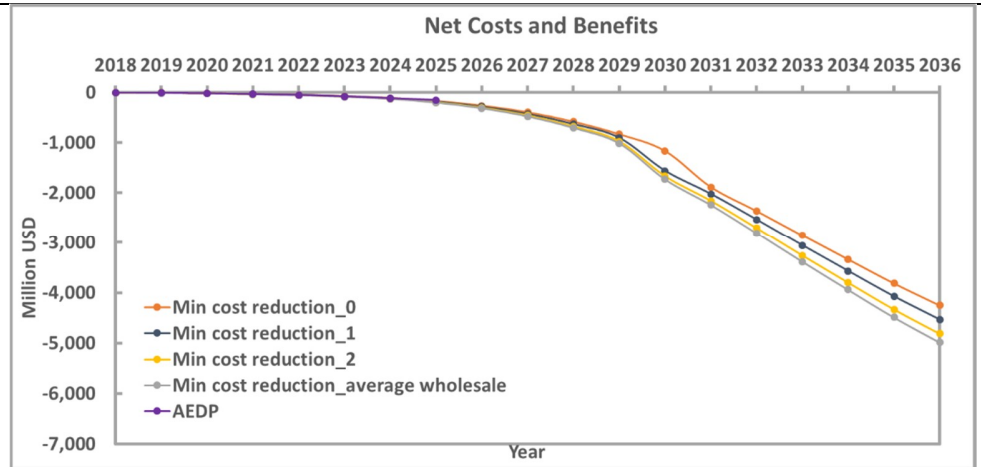

Max cost reduction

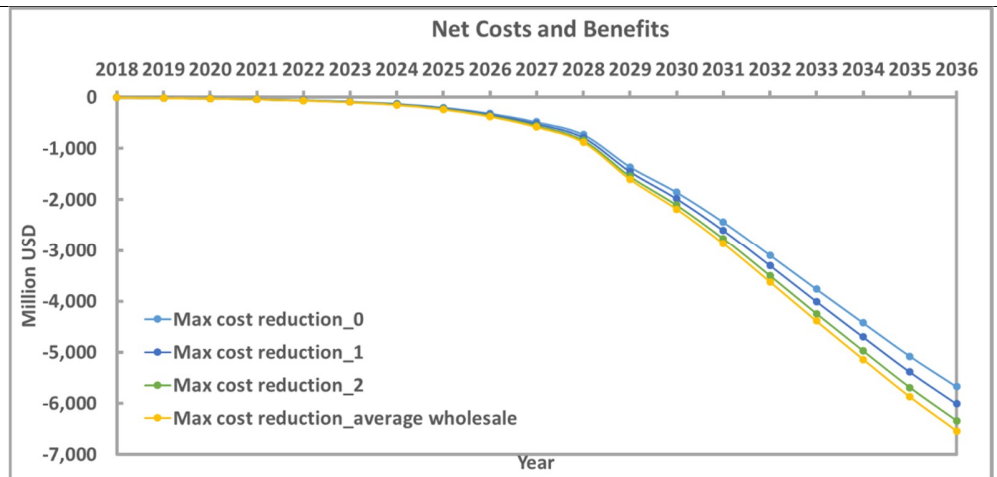

Table S8. PV capacity credits.

(a) MEA

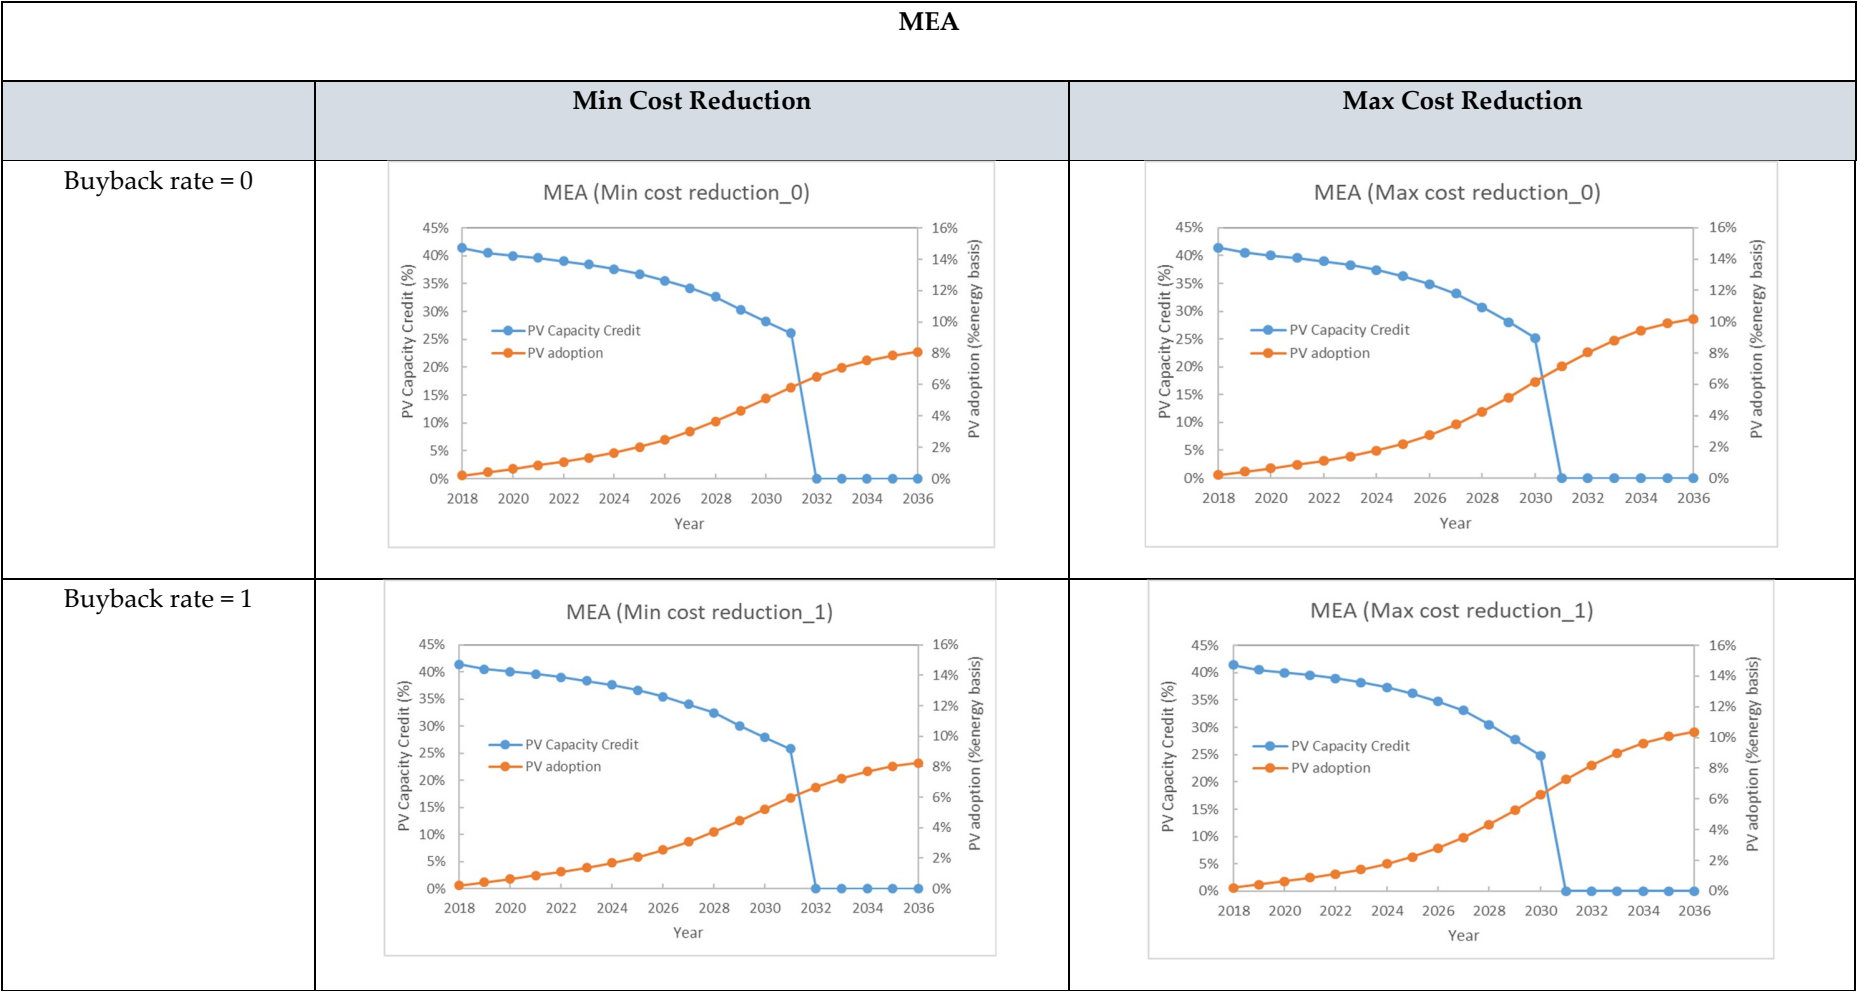

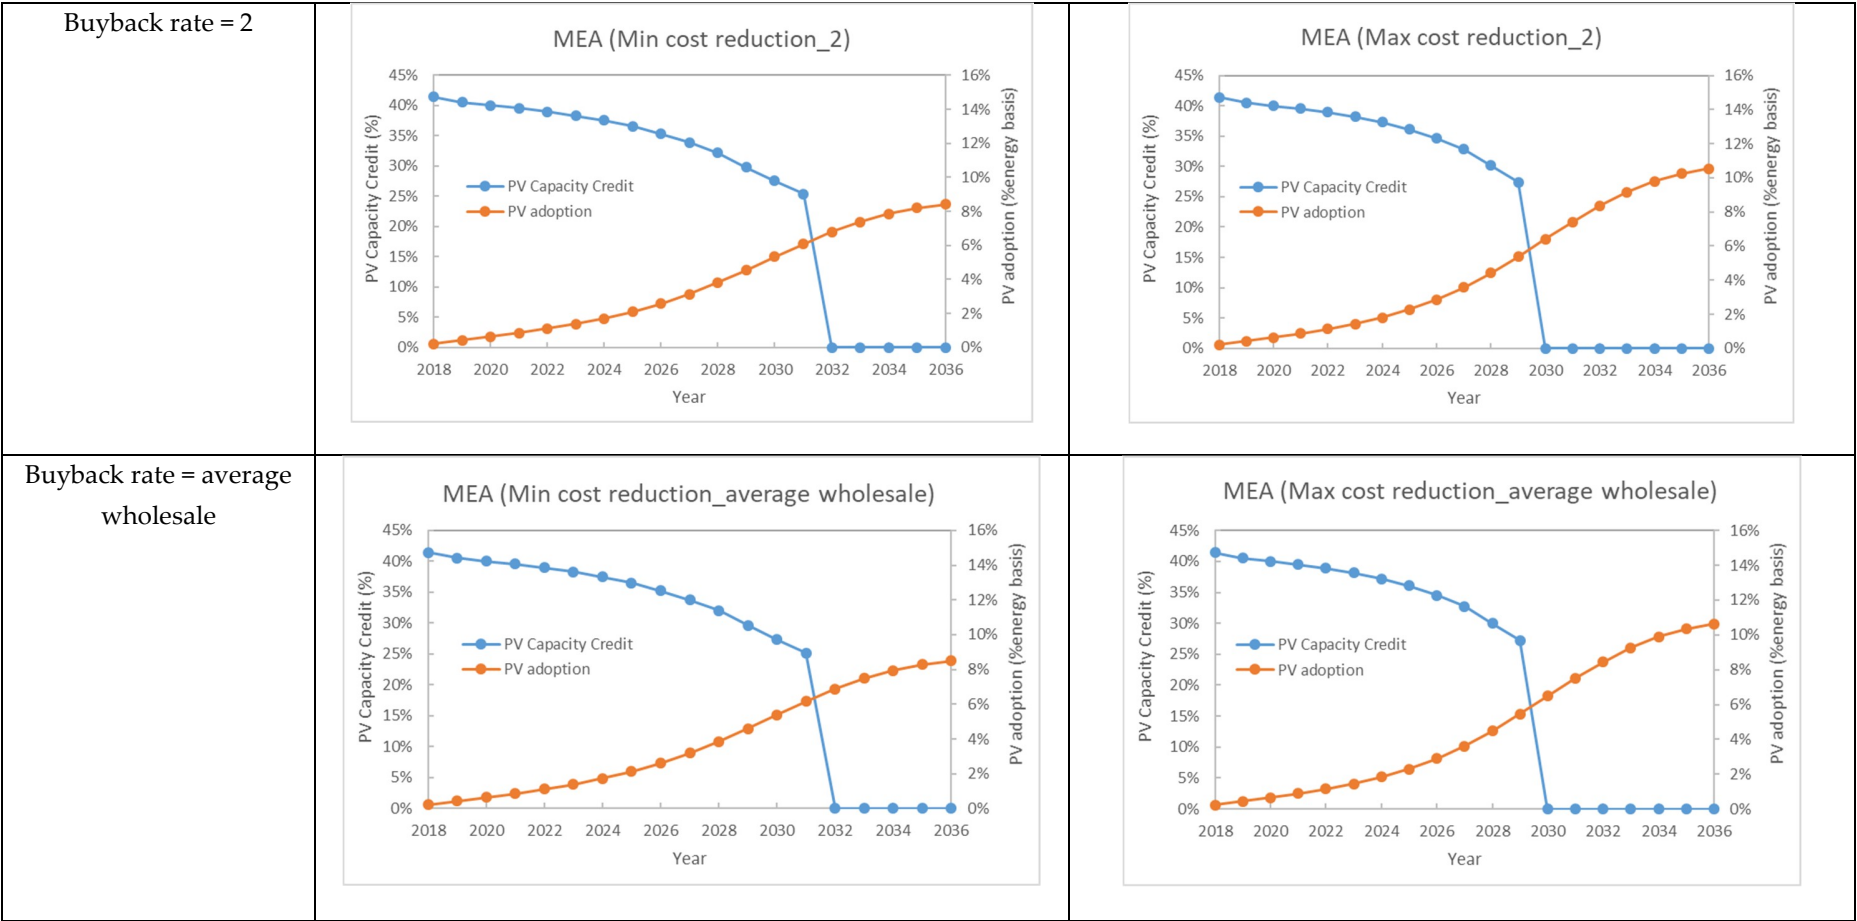

(b) PEA

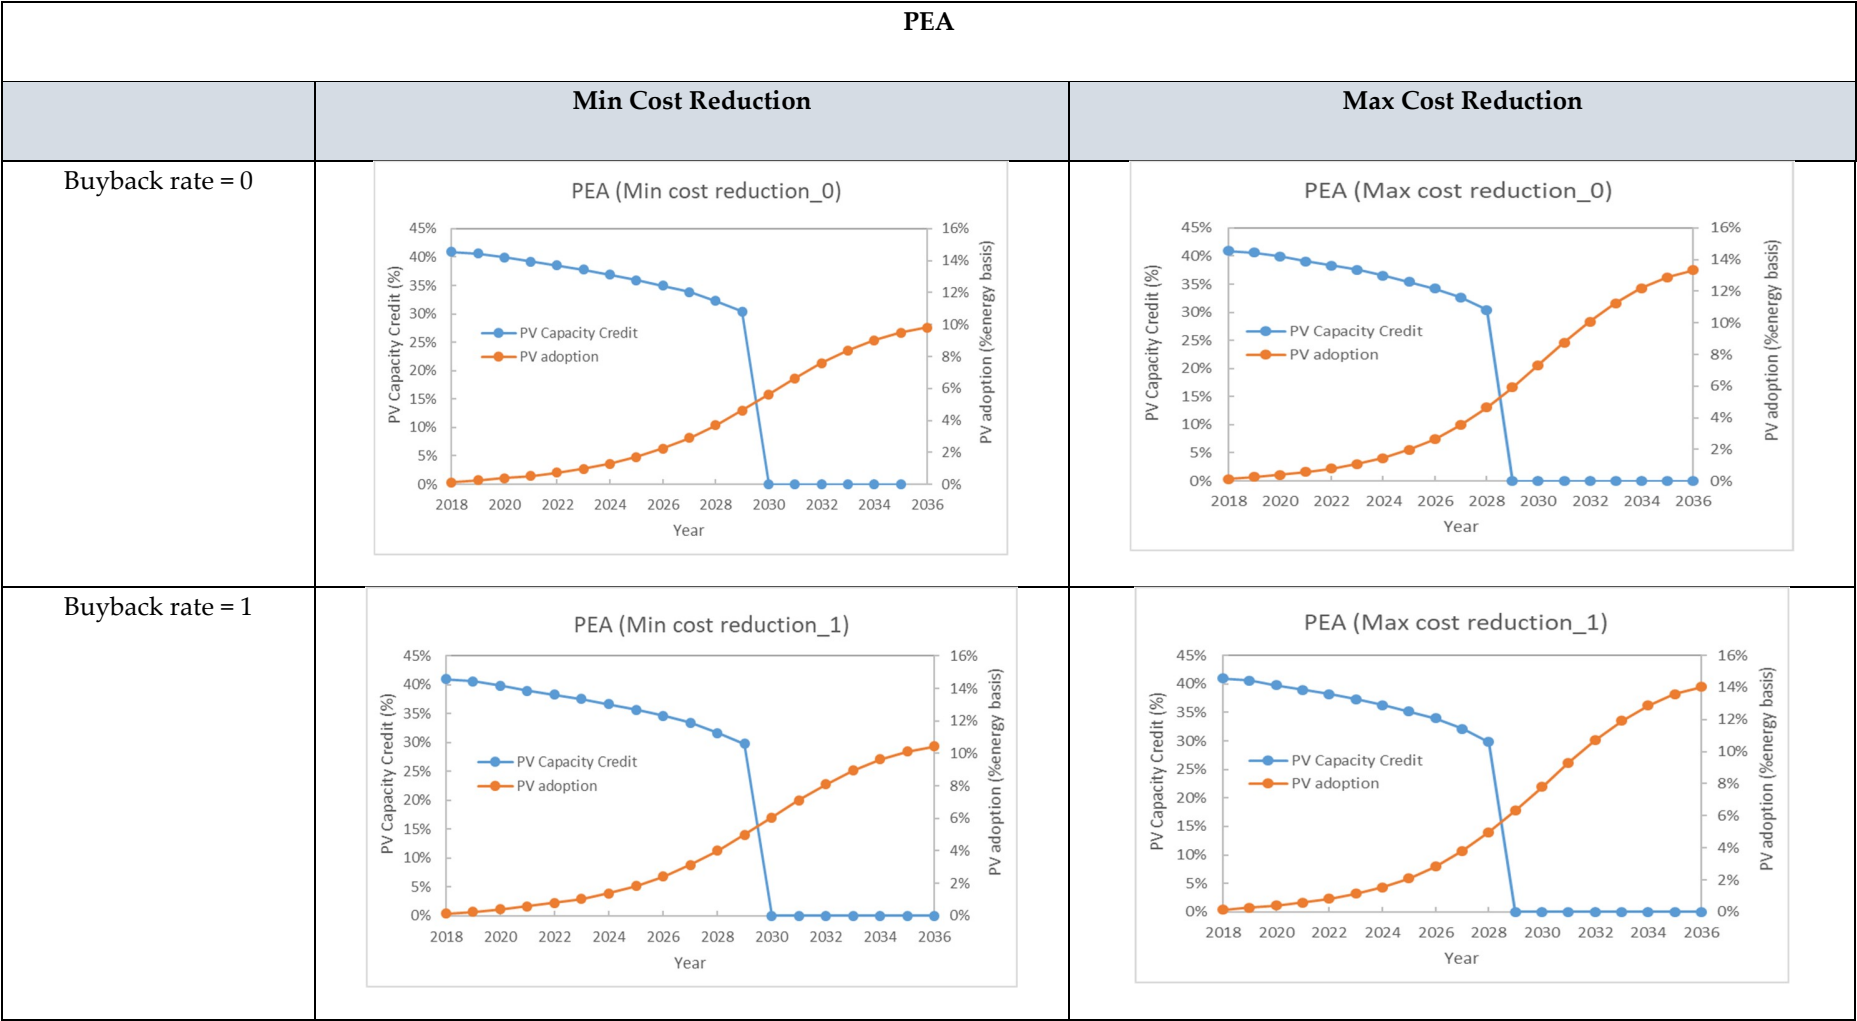

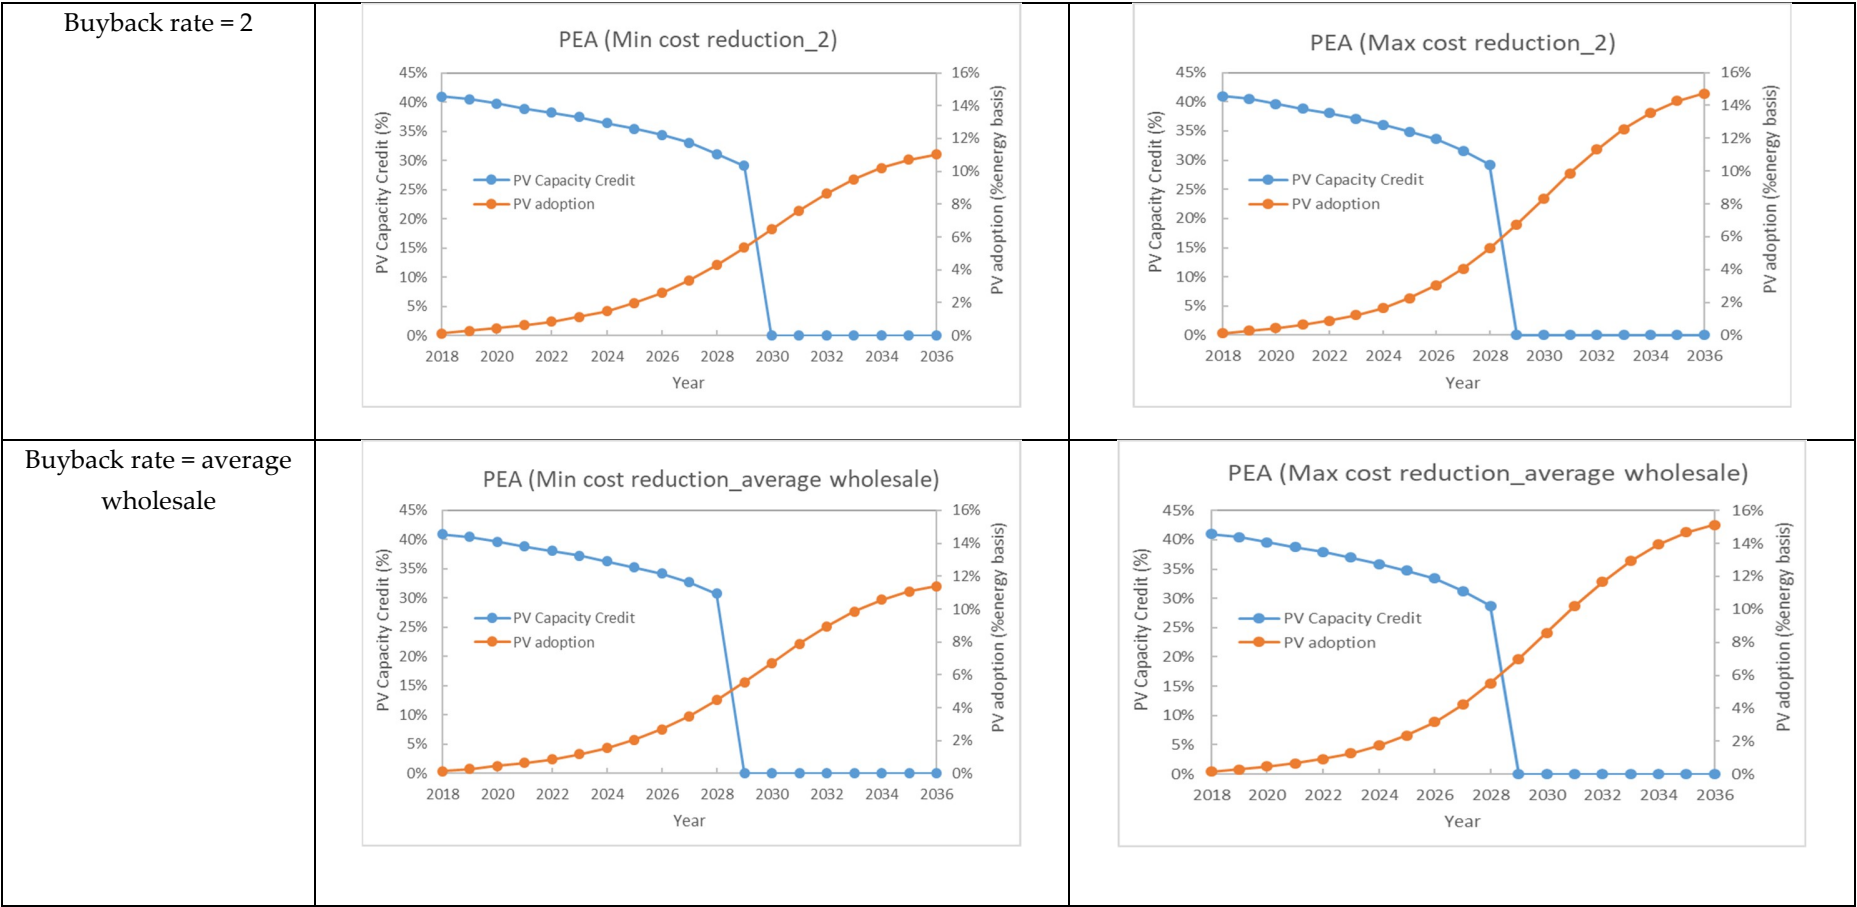

(c) EGAT

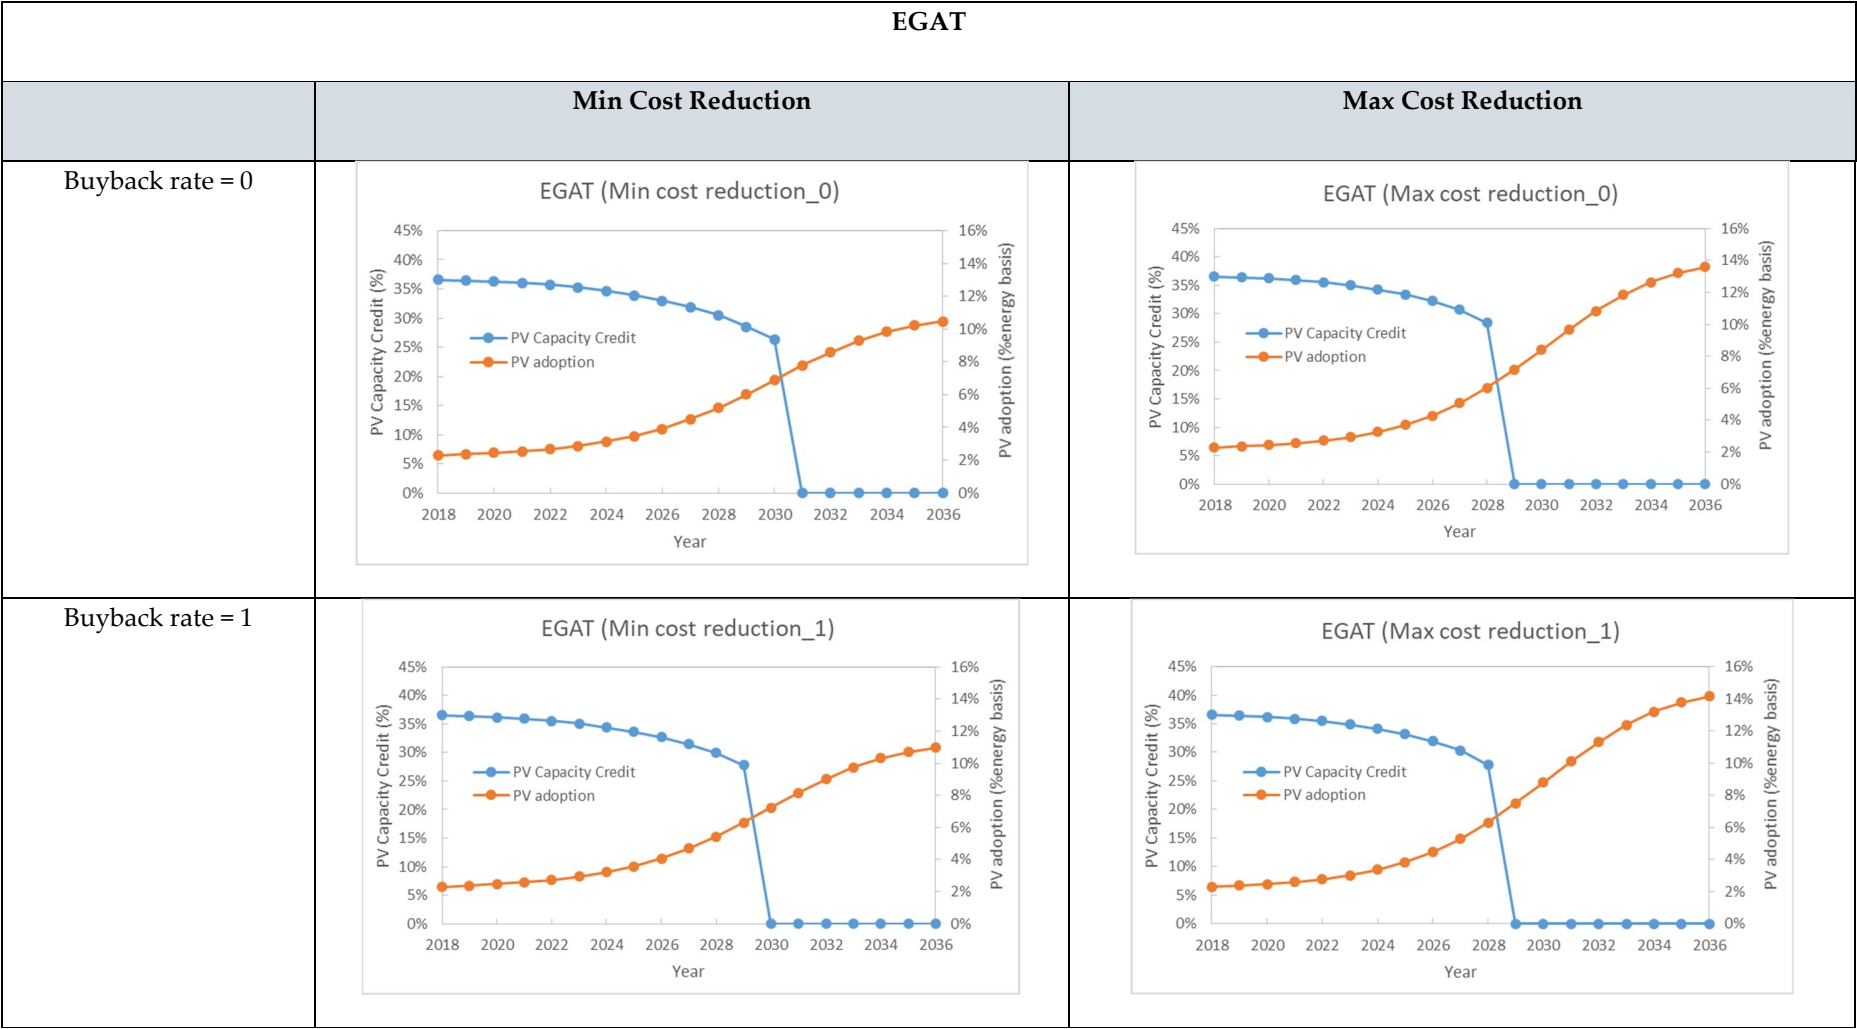



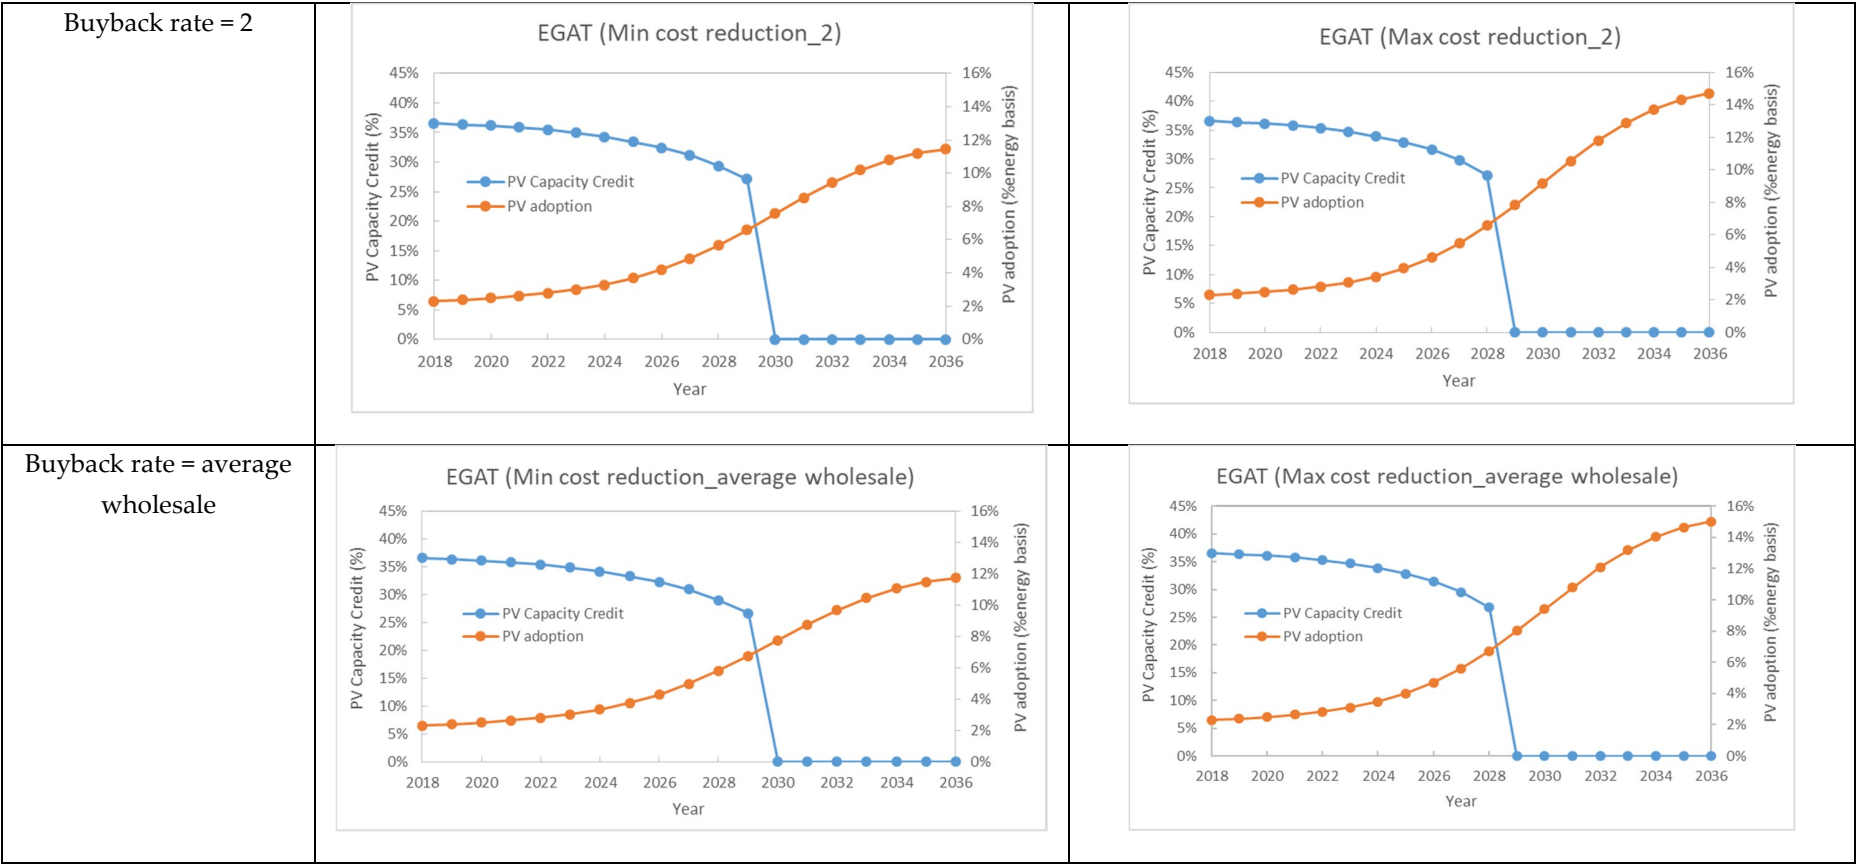

Supplement: s1 [file s1]
